# Supplementary material for: Structure-guided design of a selective inhibitor of the methyltransferase KMT9 with cellular activity
Source: PubMed Central journal article supplement (PMC10762027; doi:10.1038/s41467-023-44243-6), 2024-01-02

# Supplemental data: Mass spectrometry

## Compound 1a

D:\data\_2019\juphr92shr1

1/24/2019 9:18:42 AM

nbl344

juphr92shr1 #1 RT: 0.02 AV: 1 NL: 1.45E7  
T: FTMS + p ESI Full lock ms [150.00-900.00]

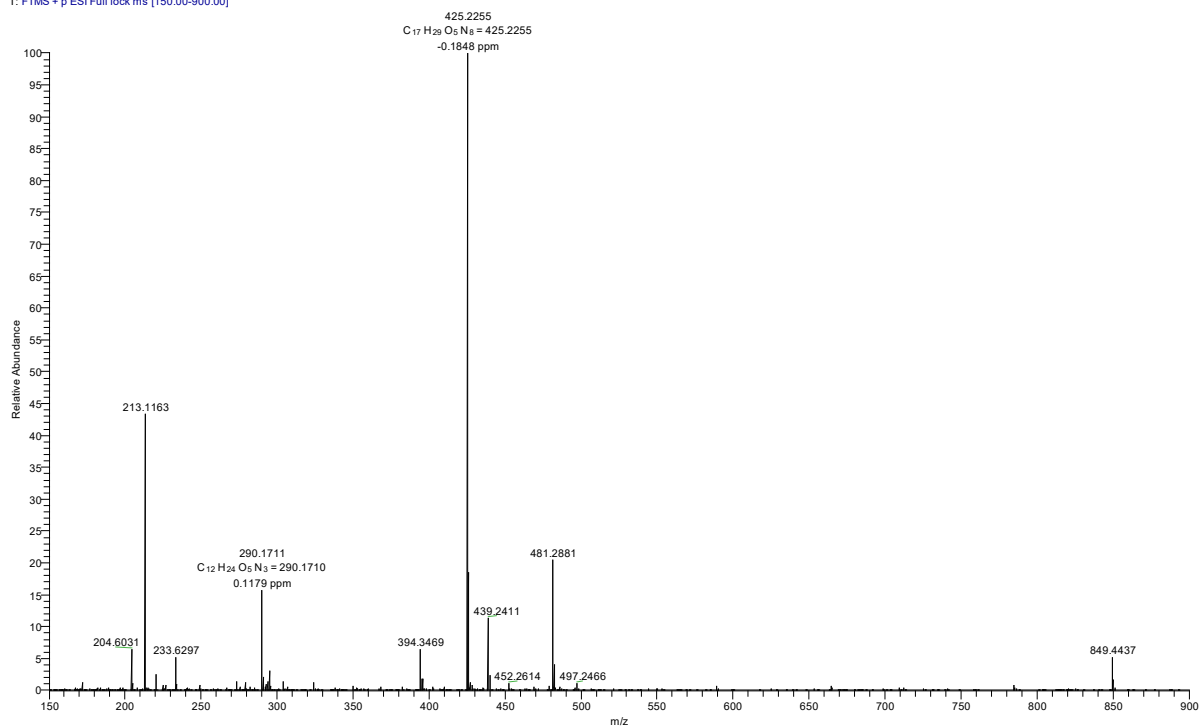

## Compound 2b

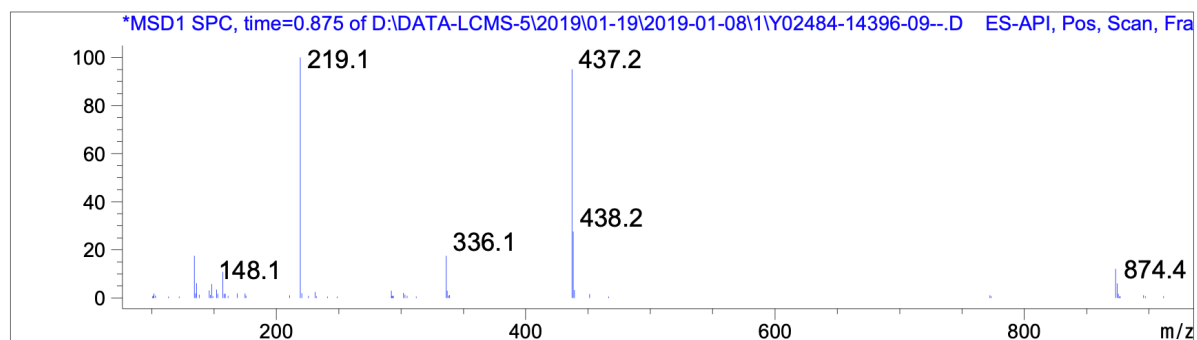

## Compound 1c

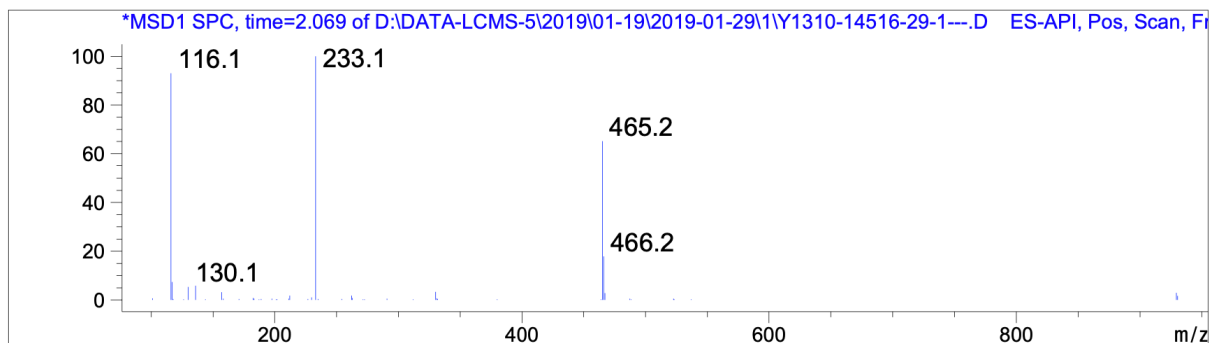

## Compound 2a

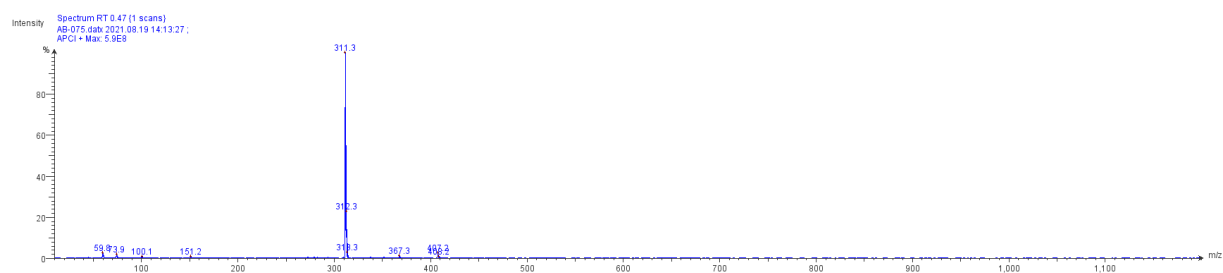

## Compound 2b

D:\data\_2023\juphu29shr1

6/22/2023 11:16:39 AM

ab077

juphu29shr1 #1 RT: 0.02 Av: 1 NL: 1.37E8  
T: FTMS + p ESI Full ms [100.00-1200.00]

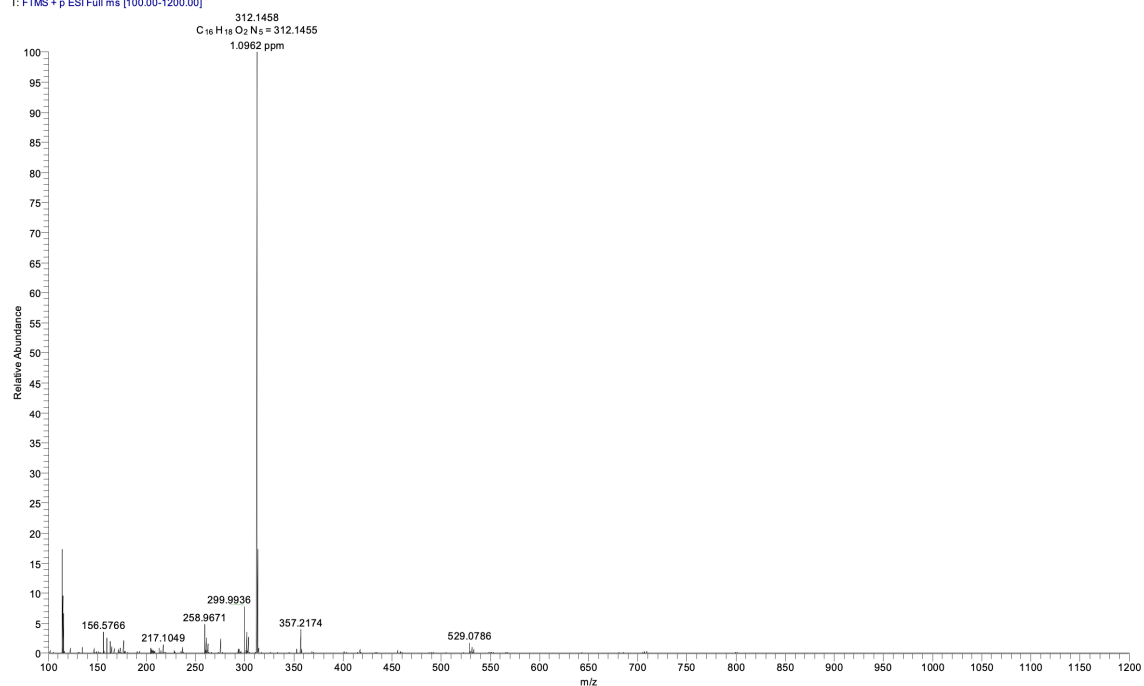

## Compound 2c

Intensity Spectrum RT 0.14 - 0.27 (6 scans)  
afterprep date: 2021.09.24 12:19:14 ;  
APCI • Max: 6.2E8

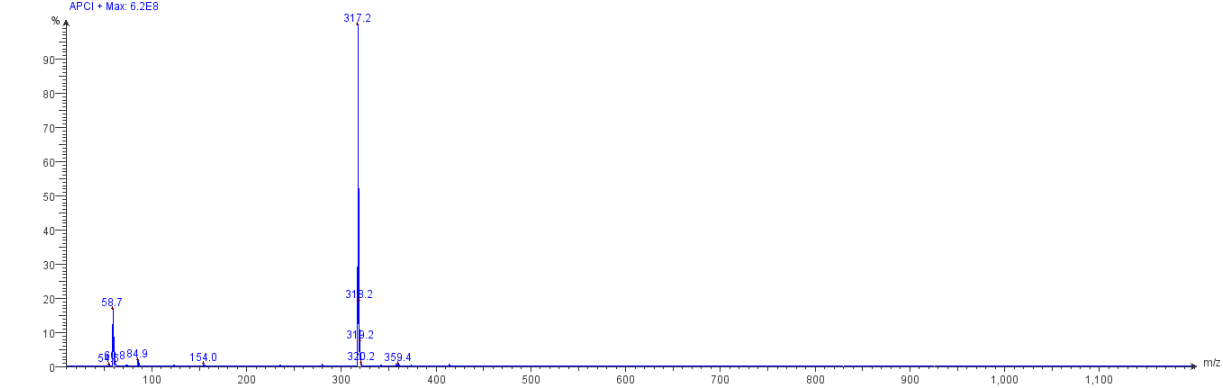

## Compound 2d

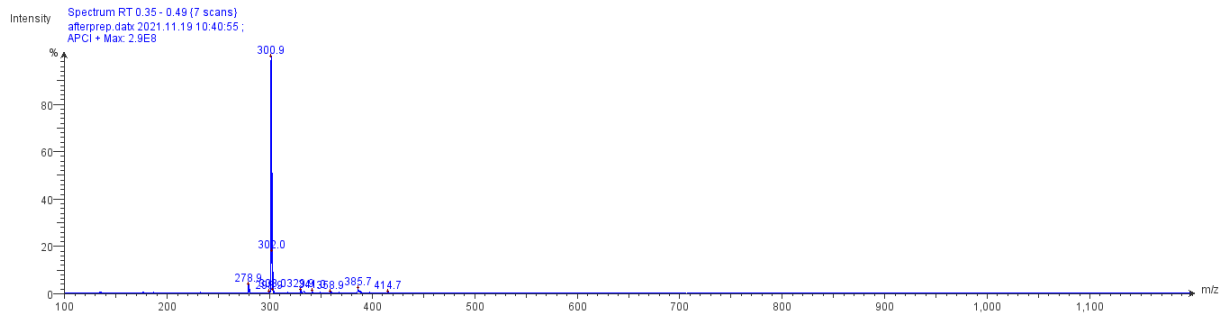

## Compound 2e

### Mass Spectrum

Line#: 1

Acquisition Mode: Scan (Positive)

R.Time: 0.942(Scan#:146) Spectrum Mode: Averaged 0.935-0.948(145-147)

BasePeak: 301.2(39633)

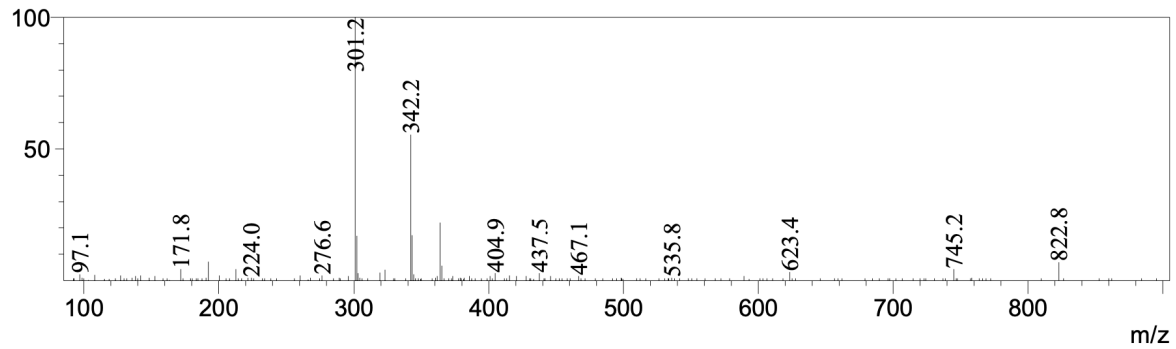

## Compound 2f

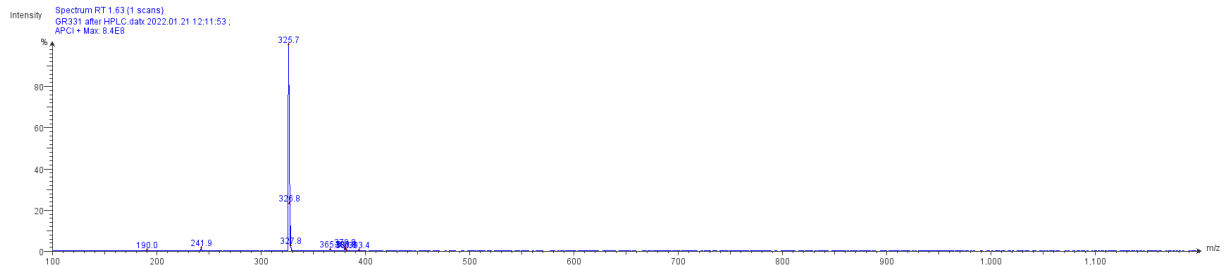

## Compound 2g

### Mass Spectrum

Line#: 1

Acquisition Mode: Scan (Positive)

R.Time: 0.928(Scan#:144) Spectrum Mode: Single 0.928(144) Background: 0.895-0.982(139-152)

BasePeak: 340.2(26794)

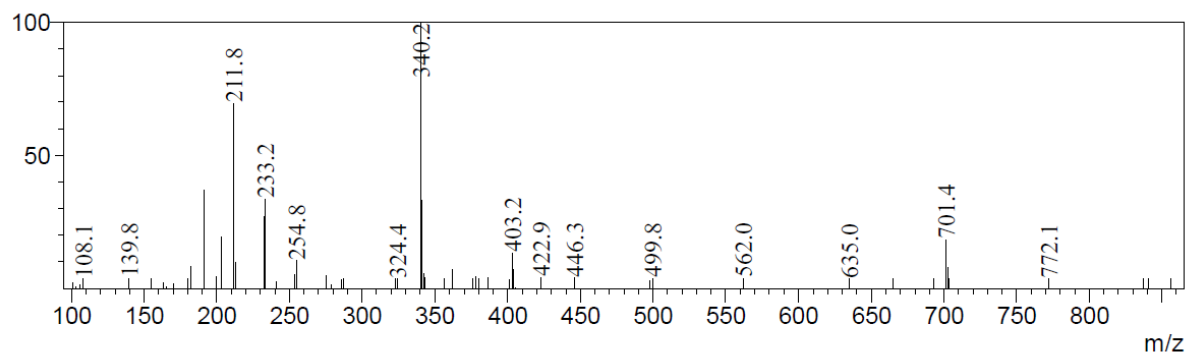

## Compound 2h

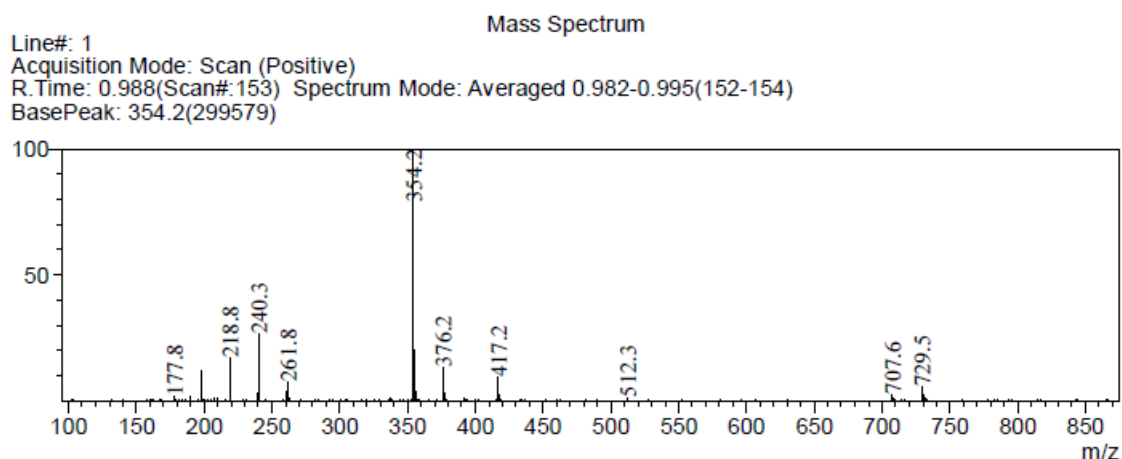

## Compound 3a

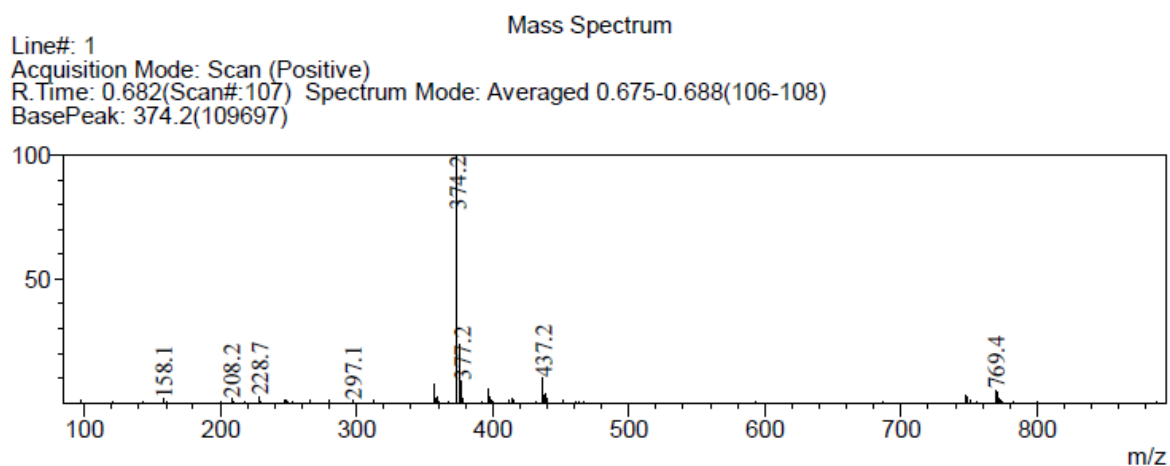

## Compound 3b

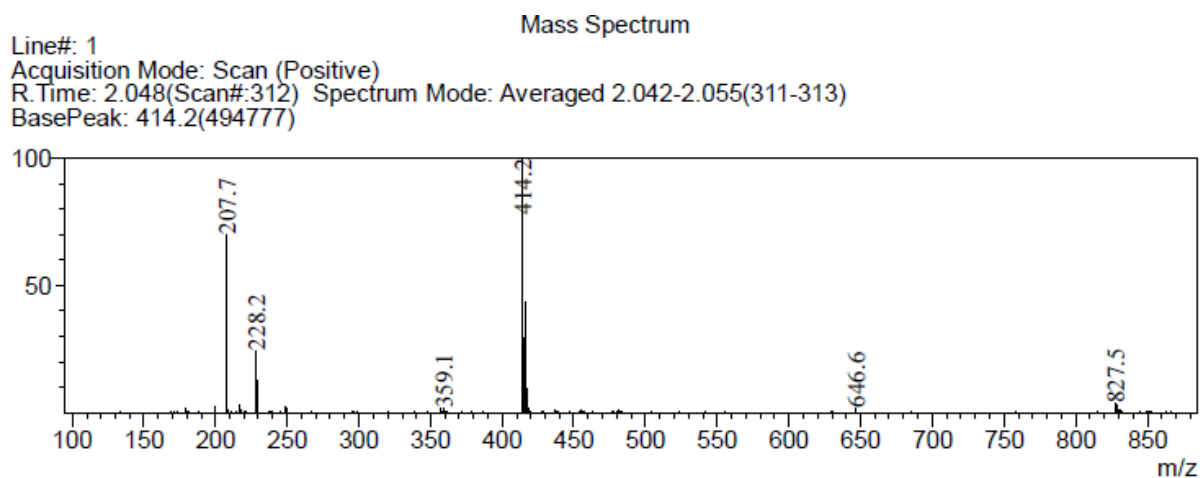

## Compound 4/KMI169

### Mass Spectrum

Line#: 1

Acquisition Mode: Scan (Positive)

R.Time: 1.188(Scan#:182-184) Spectrum Mode: Averaged 1.182-1.195(182-184)

BasePeak: 323.2(152487)

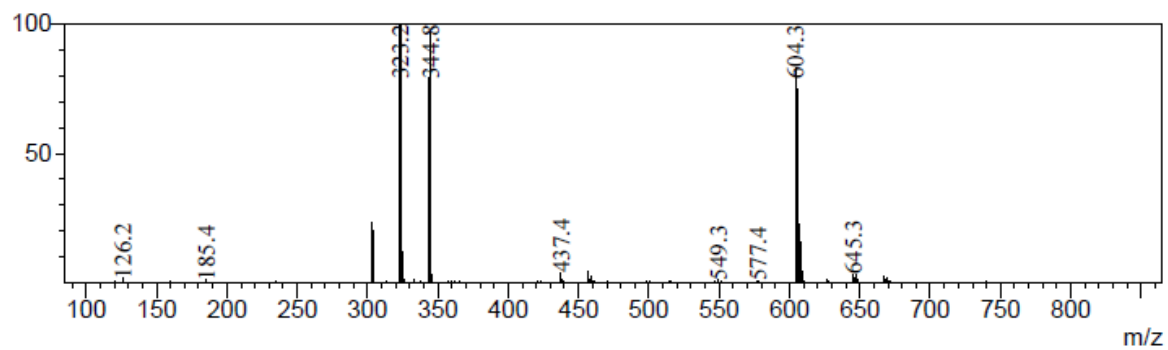

## Compound KMI169Ctrl

### Mass Spectrum

Line#: 1

Acquisition Mode: Scan (Positive)

R.Time: 0.733(Scan#:226-228) Spectrum Mode: Averaged 0.730-0.737(226-228)

BasePeak: 316.9(555571)

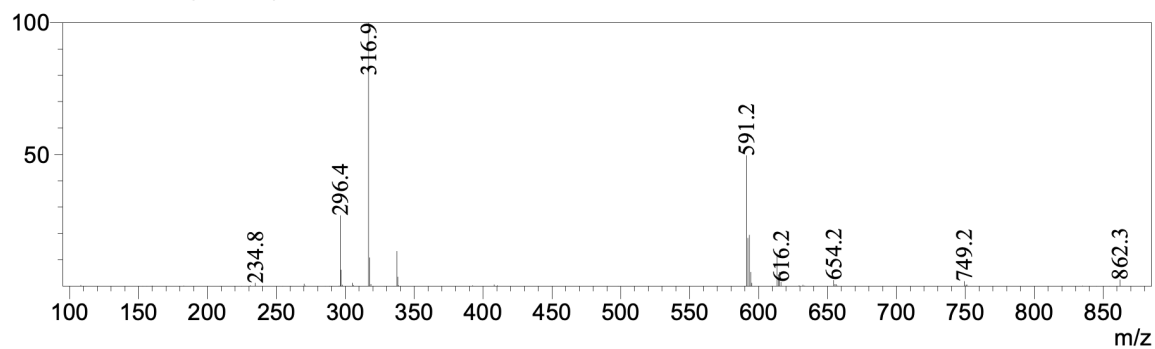

Supplement: 41467_2023_44243_MOESM3_ESM.pdf [file 41467_2023_44243_MOESM3_ESM.pdf]
