# Supplementary material for: Structure-guided design of a selective inhibitor of the methyltransferase KMT9 with cellular activity
Source: PubMed Central journal article supplement (PMC10762027; doi:10.1038/s41467-023-44243-6), 2024-01-02
Supplement: 41467_2023_44243_MOESM2_ESM.pdf [file 41467_2023_44243_MOESM2_ESM.pdf]

## **Description of Additional Supplementary Files:**

**Supplementary Data 1:** Mass spectrometry data of the final compounds.
